# Supplementary material for: Exploring the Regulation and Function of Rpl3l in the Development of Early-Onset Dilated Cardiomyopathy and Congestive Heart Failure Using Systems Genetics Approach
Source: MDPI journal article supplement (doi:10.3390/genes15010053), 2023-12-29
Supplement: s1 [file s1]

## Supplementary Information

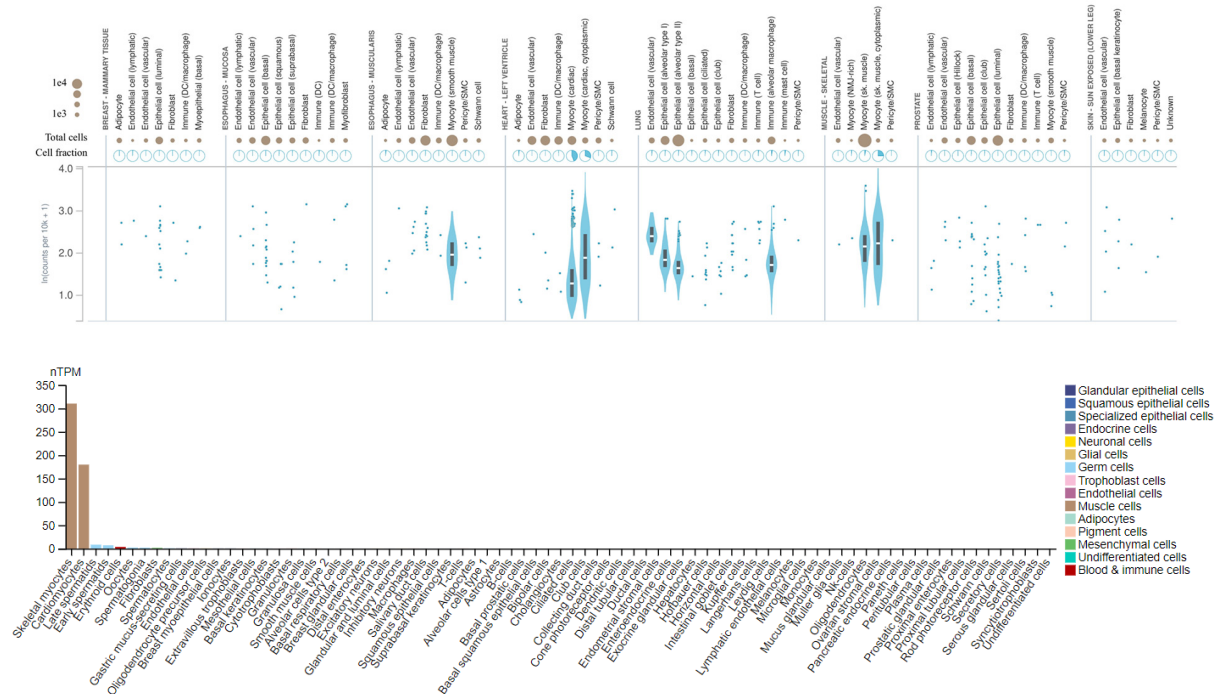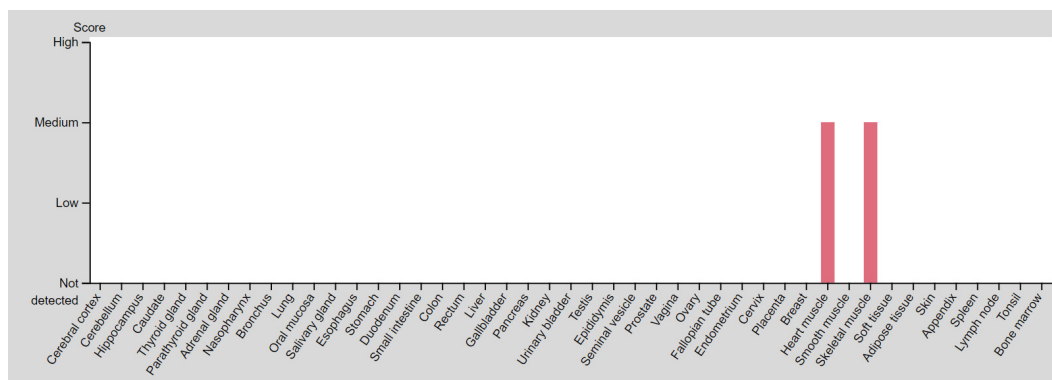

(<https://www.proteinatlas.org>) and is based on immunohistochemical assays. As shown in the figure, RPL3L protein is specifically expressed in heart and skeletal muscle tissues.

**Supplementary Table S1. 'MAPK signaling' pathway genes common between human and mouse**

| Symbol   | Name                                                                 | logFC<br>[Human] | Abs fold<br>[Human] | adj.P.Val<br>[Human] | Sample<br>p(r)<br>[Mouse] |
|----------|----------------------------------------------------------------------|------------------|---------------------|----------------------|---------------------------|
| FLT1     | fms related receptor tyrosine kinase 1                               | -0.64            | -1.56               | 6.28E-05             | 0.0499                    |
| EGFR     | epidermal growth factor receptor                                     | 0.49             | 1.40                | 0.00025              | 0.0103                    |
| PPM1A    | protein phosphatase, Mg <sup>2+</sup> /Mn <sup>2+</sup> dependent 1A | -0.56            | -1.48               | 0.002391             | 0.0445                    |
| PPP3CC   | protein phosphatase 3 catalytic subunit gamma                        | 0.39             | 1.31                | 0.003197             | 0.0006                    |
| PPP5C    | protein phosphatase 5 catalytic subunit                              | 0.25             | 1.19                | 0.012586             | 0.0096                    |
| FGFR1    | fibroblast growth factor receptor 1                                  | -0.25            | -1.19               | 0.012764             | 0.0002                    |
| ERBB3    | erb-b2 receptor tyrosine kinase 3                                    | 0.33             | 1.25                | 0.030347             | 0.0269                    |
| CACNG6   | calcium voltage-gated channel auxiliary subunit gamma 6              | 0.50             | 1.42                | 0.000241             | 0.0346                    |
| LAMTOR3  | late endosomal/lysosomal adaptor, MAPK and MTOR activator 3          | -0.61            | -1.53               | 0.001723             | 0.0018                    |
| TNFRSF1A | TNF receptor superfamily member 1A                                   | -0.53            | -1.44               | 0.004441             | 0.0279                    |
| MKNK2    | MAPK interacting serine/threonine kinase 2                           | -0.62            | -1.53               | 0.004473             | 0.0076                    |
| TGFB2    | transforming growth factor beta receptor 2                           | -0.76            | -1.70               | 0.00594              | 0.0006                    |
| IKBKB    | inhibitor of nuclear factor kappa B kinase subunit beta              | -0.46            | -1.37               | 0.006658             | 0.0283                    |
| MAPKAPK5 | MAPK activated protein kinase 5                                      | -0.63            | -1.54               | 0.007019             | 0.0096                    |
| PRKACA   | protein kinase cAMP-activated catalytic subunit alpha                | 0.31             | 1.24                | 0.012752             | 0.0263                    |
| CACNA1H  | calcium voltage-gated channel subunit alpha1 H                       | 0.39             | 1.31                | 0.016581             | 0.0001                    |
| MAPK14   | mitogen-activated protein kinase 14                                  | -0.42            | -1.34               | 0.024777             | 0.0459                    |
| AKT3     | AKT serine/threonine kinase 3                                        | -0.50            | -1.41               | 0.026523             | 0.0062                    |
| CACNA2D1 | calcium voltage-gated channel auxiliary subunit alpha2delta 1        | 0.24             | 1.18                | 0.031604             | 0.0463                    |
| FLNB     | filamin B                                                            | -0.31            | -1.24               | 0.033218             | 0.0098                    |
| GADD45G  | growth arrest and DNA damage inducible gamma                         | -0.77            | -1.71               | 0.047004             | 0.0271                    |

**Supplementary Table S2. 'Adrenergic signaling in cardiomyocytes' pathway genes common between human and mouse**

| Symbol | Name                                      | logFC<br>[Human] | Abs fold<br>[Human] | adj.P.Val<br>[Human] | Sample<br>p(r)<br>[Mouse] |
|--------|-------------------------------------------|------------------|---------------------|----------------------|---------------------------|
| CREB5  | cAMP responsive element binding protein 5 | -0.85            | -1.80               | 0.002622             | 0.0199                    |
| ADCY1  | adenylate cyclase 1                       | 0.30             | 1.23                | 0.012066             | 0.0034                    |

|          |                                                                    |       |       |          |        |
|----------|--------------------------------------------------------------------|-------|-------|----------|--------|
| CACNG6   | calcium voltage-gated channel auxiliary subunit gamma 6            | 0.50  | 1.42  | 0.000241 | 0.0346 |
| PPP2CA   | protein phosphatase 2 catalytic subunit alpha                      | -0.77 | -1.71 | 0.000408 | 0.1612 |
| CREB3L2  | cAMP responsive element binding protein 3 like 2                   | 0.33  | 1.26  | 0.000678 | 0.0040 |
| ADCY7    | adenylate cyclase 7                                                | 0.39  | 1.31  | 0.000871 | 0.0289 |
| ADCY8    | adenylate cyclase 8                                                | 0.43  | 1.35  | 0.002981 | 0.0497 |
| ATP1B3   | ATPase Na <sup>+</sup> /K <sup>+</sup> transporting subunit beta 3 | -0.48 | -1.39 | 0.008923 | 0.0294 |
| PRKACA   | protein kinase cAMP-activated catalytic subunit alpha              | 0.31  | 1.24  | 0.012752 | 0.0263 |
| ADCY2    | adenylate cyclase 2                                                | -0.26 | -1.20 | 0.016076 | 0.0035 |
| MAPK14   | mitogen-activated protein kinase 14                                | -0.42 | -1.34 | 0.024777 | 0.0459 |
| AKT3     | AKT serine/threonine kinase 3                                      | -0.50 | -1.41 | 0.026523 | 0.0062 |
| TPM4     | tropomyosin 4                                                      | -0.70 | -1.63 | 0.031045 | 0.1457 |
| CACNA2D1 | calcium voltage-gated channel auxiliary subunit alpha2delta 1      | 0.24  | 1.18  | 0.031604 | 0.0463 |
| ADRA1A   | adrenoceptor alpha 1A                                              | -0.52 | -1.44 | 0.034298 | 0.0005 |
| AGTR1    | angiotensin II receptor type 1                                     | -0.79 | -1.72 | 0.009744 | 0.0274 |

**Supplementary Table S3. 'Autophagy - animal' pathway genes common between human and mouse**

| Symbol | Name                                                  | logFC [Human] | Abs fold [Human] | adj.P.Val [Human] | Sample p(r) [Mouse] |
|--------|-------------------------------------------------------|---------------|------------------|-------------------|---------------------|
| RRAGC  | Ras related GTP binding C                             | -0.61         | -1.53            | 0.000643          | 0.0434              |
| ATG10  | autophagy related 10                                  | 0.33          | 1.26             | 0.003734          | 0.0001              |
| PRKCQ  | protein kinase C theta                                | 0.36          | 1.28             | 0.00735           | 0.0250              |
| PPP2CA | protein phosphatase 2 catalytic subunit alpha         | -0.77         | -1.71            | 0.000408          | 0.1612              |
| WDR41  | WD repeat domain 41                                   | -0.56         | -1.48            | 0.00298           | 0.0309              |
| PRKACA | protein kinase cAMP-activated catalytic subunit alpha | 0.31          | 1.24             | 0.012752          | 0.0263              |
| AKT3   | AKT serine/threonine kinase 3                         | -0.50         | -1.41            | 0.026523          | 0.0062              |
| CAMKK2 | calcium/calmodulin dependent protein kinase kinase 2  | 0.25          | 1.19             | 0.04589           | 0.0338              |
| HMGB1  | high mobility group box 1                             | -0.47         | -1.38            | 0.049242          | 0.0143              |

**Supplementary Table S4. 'Protein processing in endoplasmic reticulum' pathway genes common between human and mouse**

| Symbol | Name                               | logFC [Human] | Abs fold [Human] | adj.P.Val [Human] | Sample p(r) [Mouse] |
|--------|------------------------------------|---------------|------------------|-------------------|---------------------|
| SSR3   | signal sequence receptor subunit 3 | -0.62         | -1.54            | 0.00921           | 0.0284              |
| CANX   | calnexin                           | -0.59         | -1.51            | 0.021533          | 0.0057              |
| ATF6   | activating transcription factor 6  | -0.31         | -1.24            | 0.023509          | 0.0347              |

|        |                                                            |       |       |          |        |
|--------|------------------------------------------------------------|-------|-------|----------|--------|
| DERL1  | derlin 1                                                   | -0.61 | -1.53 | 0.031392 | 0.2102 |
| UBE2G1 | ubiquitin conjugating enzyme E2 G1                         | -0.67 | -1.59 | 0.0018   | 0.1310 |
| SEC61G | SEC61 translocon subunit gamma                             | -0.82 | -1.77 | 0.004346 | 0.0222 |
| PDIA3  | protein disulfide isomerase family A member 3              | -0.50 | -1.42 | 0.016309 | 0.0304 |
| PRKN   | parkin RBR E3 ubiquitin protein ligase                     | 0.19  | 1.14  | 0.028373 | 0.0144 |
| CKAP4  | cytoskeleton associated protein 4                          | 0.19  | 1.14  | 0.038451 | 0.0240 |
| STT3B  | STT3 oligosaccharyltransferase complex catalytic subunit B | -0.35 | -1.28 | 0.040382 | 0.0172 |
| STT3A  | STT3 oligosaccharyltransferase complex catalytic subunit A | -0.44 | -1.36 | 0.045837 | 0.0172 |

**Supplementary Table S5. 'Focal adhesion' pathway genes common between human and mouse**

| Symbol | Name                                   | logFC [Human] | Abs fold [Human] | adj.P.Val [Human] | Sample p(r) [Mouse] |
|--------|----------------------------------------|---------------|------------------|-------------------|---------------------|
| FLT1   | fms related receptor tyrosine kinase 1 | -0.64         | -1.56            | 0.00006           | 0.04985             |
| EGFR   | epidermal growth factor receptor       | 0.49          | 1.40             | 0.00025           | 0.01033             |
| PARVA  | parvin alpha                           | -0.54         | -1.46            | 0.00129           | 0.02801             |
| LAMA4  | laminin subunit alpha 4                | 0.52          | 1.43             | 0.00010           | 0.01558             |
| VWF    | von Willebrand factor                  | 0.41          | 1.33             | 0.00130           | 0.00011             |
| COL1A1 | collagen type I alpha 1 chain          | 0.35          | 1.27             | 0.00676           | 0.00110             |
| ZYX    | zyxin                                  | 0.54          | 1.45             | 0.01584           | 0.00144             |
| LAMA5  | laminin subunit alpha 5                | -0.33         | -1.26            | 0.01793           | 0.02276             |
| ACTN1  | actinin alpha 1                        | 0.27          | 1.20             | 0.02479           | 0.00028             |
| AKT3   | AKT serine/threonine kinase 3          | -0.50         | -1.41            | 0.02652           | 0.00622             |
| FLNB   | filamin B                              | -0.31         | -1.24            | 0.03322           | 0.00984             |
| TLN1   | talin 1                                | -0.41         | -1.33            | 0.04639           | 0.01342             |

**Supplementary Table S6. 'PI3K-Akt signaling' pathway genes common between human and mouse**

| Symbol | Name                                         | logFC [Human] | Abs fold [Human] | adj.P.Val [Human] | Sample p(r) [Mouse] |
|--------|----------------------------------------------|---------------|------------------|-------------------|---------------------|
| CDK6   | cyclin dependent kinase 6                    | -0.67         | -1.59            | 0.00003           | 0.02976             |
| FLT1   | fms related receptor tyrosine kinase 1       | -0.64         | -1.56            | 0.00006           | 0.04985             |
| EGFR   | epidermal growth factor receptor             | 0.49          | 1.40             | 0.00025           | 0.01033             |
| GNG4   | G protein subunit gamma 4                    | 0.33          | 1.25             | 0.00056           | 0.02995             |
| CASP9  | caspase 9                                    | -0.46         | -1.38            | 0.00073           | 0.04546             |
| CREB5  | cAMP responsive element binding protein 5    | -0.85         | -1.80            | 0.00262           | 0.01987             |
| FGFR1  | fibroblast growth factor receptor 1          | -0.25         | -1.19            | 0.01276           | 0.00022             |
| MCL1   | MCL1 apoptosis regulator, BCL2 family member | -0.49         | -1.40            | 0.01944           | 0.04869             |

|         |                                                                             |       |       |         |         |
|---------|-----------------------------------------------------------------------------|-------|-------|---------|---------|
| ERBB3   | erb-b2 receptor tyrosine kinase 3                                           | 0.33  | 1.25  | 0.03035 | 0.02686 |
| OSMR    | oncostatin M receptor                                                       | -0.50 | -1.42 | 0.04204 | 0.00755 |
| LAMA4   | laminin subunit alpha 4                                                     | 0.52  | 1.43  | 0.00010 | 0.01558 |
| PPP2CA  | protein phosphatase 2 catalytic subunit alpha                               | -0.77 | -1.71 | 0.00041 | 0.03263 |
| YWHAZ   | tyrosine 3-monooxygenase/tryptophan 5-monooxygenase activation protein zeta | -0.63 | -1.54 | 0.00062 | 0.01604 |
| CREB3L2 | cAMP responsive element binding protein 3 like 2                            | 0.33  | 1.26  | 0.00068 | 0.00396 |
| VWF     | von Willebrand factor                                                       | 0.41  | 1.33  | 0.00130 | 0.00011 |
| GNB1    | G protein subunit beta 1                                                    | -0.48 | -1.39 | 0.00426 | 0.03153 |
| IKBKB   | inhibitor of nuclear factor kappa B kinase subunit beta                     | -0.46 | -1.37 | 0.00666 | 0.02835 |
| COL1A1  | collagen type I alpha 1 chain                                               | 0.35  | 1.27  | 0.00676 | 0.00110 |
| LAMA5   | laminin subunit alpha 5                                                     | -0.33 | -1.26 | 0.01793 | 0.02276 |
| AKT3    | AKT serine/threonine kinase 3                                               | -0.50 | -1.41 | 0.02652 | 0.00622 |
